# Supplementary material
Source: publisher figshare collection journal article supplement (https://diabetesjournals.figshare.com/articles/dataset/_/19808653)

**Supplemental Table 1. WB and WES Antibody and Assay Conditions**

| <b>Antibody</b>                                              | <b>Manufacturer</b>       | <b>Cat. No.</b> | <b>Platform</b> | <b>Ab Dilution</b> |
|--------------------------------------------------------------|---------------------------|-----------------|-----------------|--------------------|
| $\beta$ -Actin                                               | Cell Signaling Technology | 4970            | WES             | 1:50               |
| Akt                                                          | Cell Signaling Technology | 9272            | WES             | 1:50               |
| Akt <sup>S473</sup>                                          | Cell Signaling Technology | 9271            | WES             | 1:50               |
| mTOR                                                         | Cell Signaling Technology | 2972            | WES             | 1:50               |
| mTOR <sup>S2448</sup>                                        | Cell Signaling Technology | 2971            | WES             | 1:50               |
| p70S6k <sup>T421/S242</sup> /<br>p85S6k <sup>T444/S447</sup> | Cell Signaling Technology | 9204            | WES             | 1:50               |
| DGAT1                                                        | Novus Biologicals         | NB100-57086     | WES             | 1:50               |
| SREBP1                                                       | Novus Biologicals         | NB100-2215      | WES             | 1:25               |
| FAS                                                          | Cell Signaling Technology | 3180            | WES             | 1:500              |
| LXR $\alpha$                                                 | Novus Biologicals         | NB400-157       | WES             | 1:25               |
| ACC <sup>Ser79</sup>                                         | Cell Signaling Technology | 3662            | WES             | 1:200              |
| ACC                                                          | Cell Signaling Technology | 3661            | WES             | 1:200              |
| SCD-1                                                        | R&D Systems               | AF7550          | WES             | 10 $\mu$ g/mL      |

| <b>Supplementary Table 2. Maternal and Infant Characteristics</b> |                      |                        |                |
|-------------------------------------------------------------------|----------------------|------------------------|----------------|
| <b>Maternal Characteristics</b>                                   |                      |                        |                |
|                                                                   | <b>Low FFA (n=9)</b> | <b>High FFA (n=10)</b> | <b>p-value</b> |
| Age (y)                                                           | 25.4 ± 5.6           | 31.9 ± 6.7             | <0.05*         |
| Pre-Pregnancy BMI (kg/m <sup>2</sup> )                            | 26.2 ± 6.3           | 28.3 ± 6.4             | 0.47           |
| Glucose (mg/dL)                                                   | 73.7 ± 7.2           | 80.3 ± 8.8             | 0.09           |
| Insulin (uU/mL)                                                   | 11.6 ± 8.0           | 14.3 ± 6.3             | 0.41           |
| HOMA-IR                                                           | 2.1 ± 1.6            | 2.9 ± 1.8              | 0.32           |
| Triglycerides (mg/dL)                                             | 152.3 ± 51.3         | 170.0 ± 53.8           | 0.48           |
| Free fatty acids (uEq/L)                                          | 289.7 ± 74.6         | 506.4 ± 104.4          | <0.0001***     |
| Gestational weight gain (kg)                                      | 12.1 ± 6.0           | 12.9 ± 6.1             | 0.763          |
| Gestational age at delivery (wks)                                 | 40.1 ± 1.1           | 39.2 ± 0.8             | <0.05*         |
| <b>Neonate Characteristics</b>                                    |                      |                        |                |
| Sex, n (f/m)                                                      | 9 (3/6)              | 10 (3/7)               | 0.88           |
| Birth weight (g)                                                  | 3334.8 ± 444.9       | 3281.6 ± 292.6         | 0.76           |
| Neonatal Adiposity (%)                                            | 9.5 ± 4.7            | 8.5 ± 3.3              | 0.64           |
| Cord blood glucose (mg/dL)                                        | 74.1 ± 11.7          | 74.1 ± 27.5            | 1.00           |
| Cord blood insulin (uIU/mL)                                       | 7.9 ± 5.2            | 8.6 ± 4.0              | 0.78           |
| Cord blood leptin (ng/mL)                                         | 10.0 ± 7.4           | 17.4 ± 13.1            | 0.21           |
| Data are mean ± SD. *Significant independent t-test, p<0.05       |                      |                        |                |

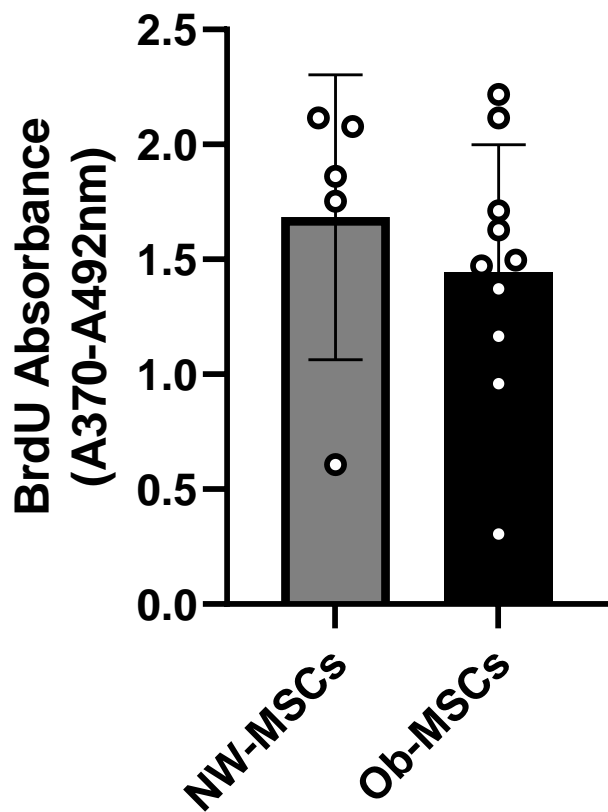

**Supplemental Figure 1.** Undifferentiated MSCs were incubated with 5-bromo-2'-deoxyuridine (BrdU) for 24h before measurement of BrdU incorporation into newly synthesized DNA as a readout of proliferation rate. BrdU incorporation was similar between NW-MSCs and Ob-MSCs.

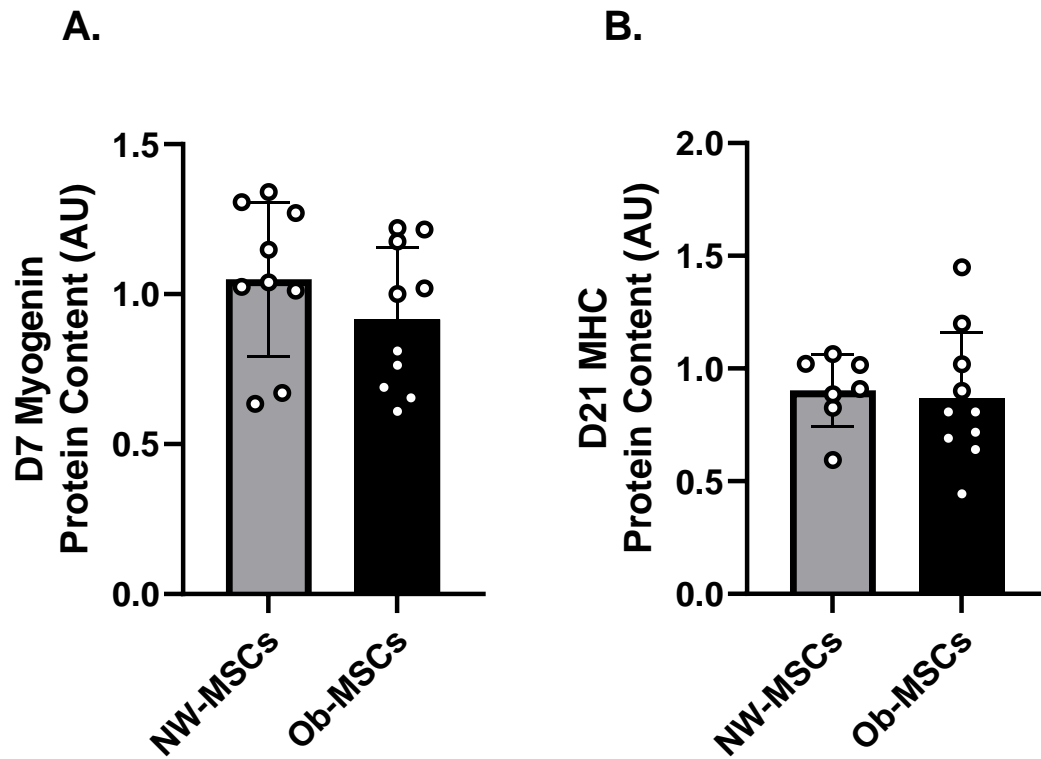

**Supplemental Figure 2.** Immunoblot analysis revealed expression of myogenic markers, Myogenin (A) and myosin heavy chain (MHC) at day 7 and day 21 of differentiation, respectively, were similar in NW-MSCs and Ob-MSCs.

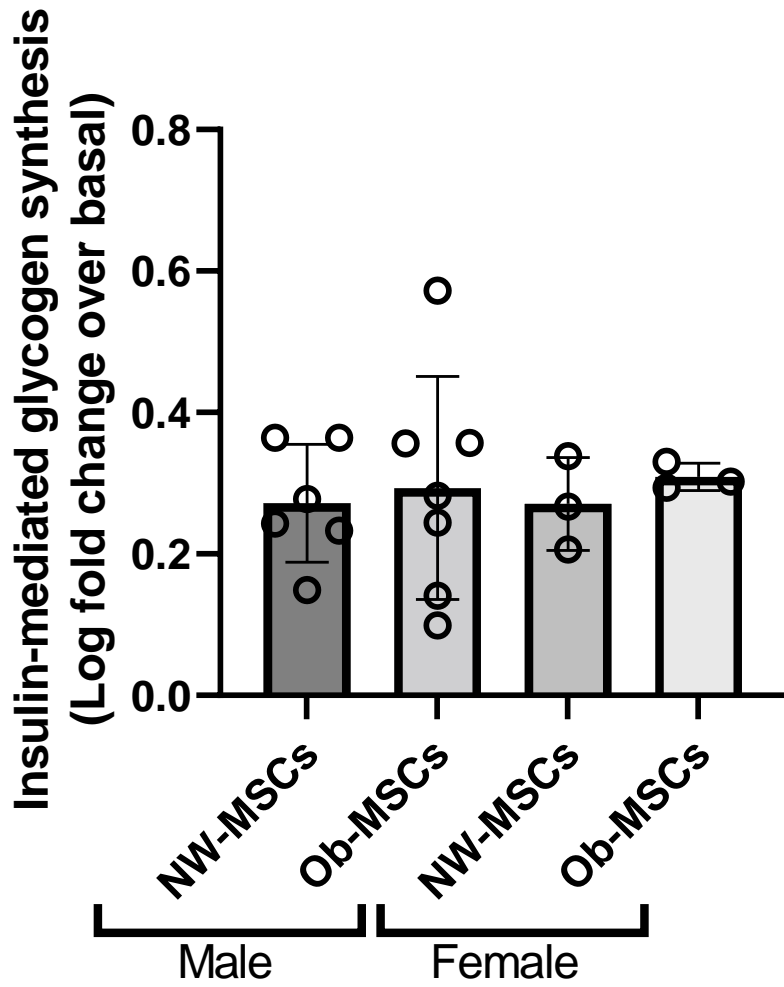

**Supplementary Figure 3.** Insulin-mediated rates of glycogen synthesis (log fold change over basal) were similar in MSCs from male and female offspring, regardless of the parent's BMI classification.

A.

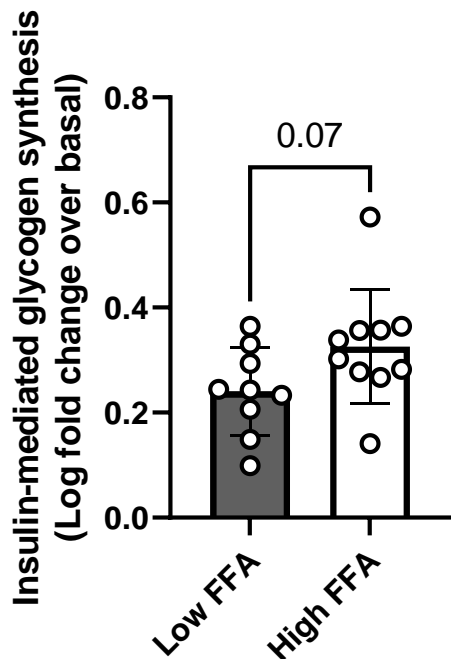

B.

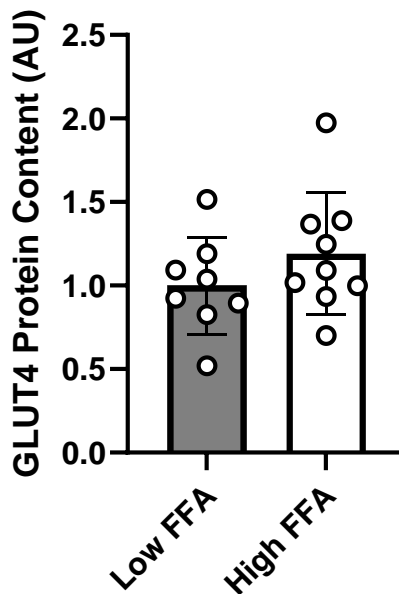

C.

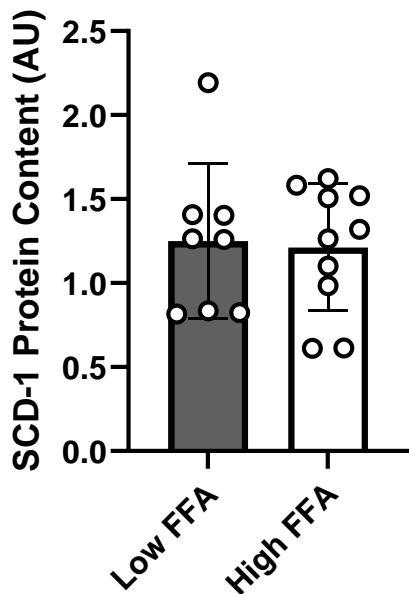

D.

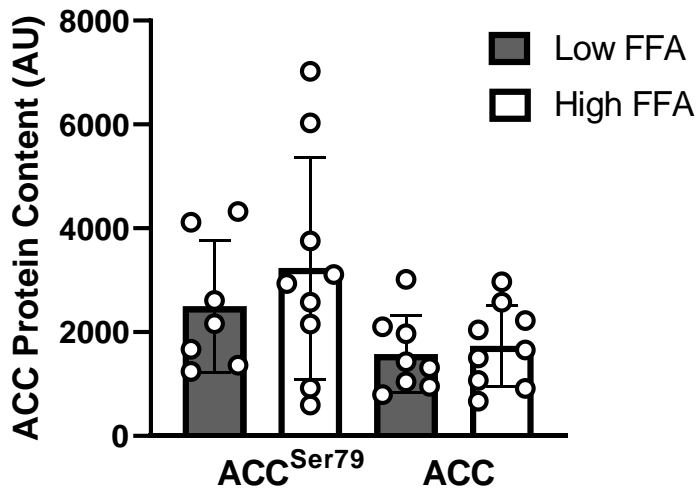

**Supplementary Figure 4.** Insulin-mediated rates of glycogen synthesis (log fold change over basal) were trending toward an increase ( $p=0.07$ ) in the MSCs from offspring born to mothers with elevated FFA during pregnancy (A). Immunoblot analysis targeting proteins involved in lipid synthesis and storage revealed similar protein content of GLUT4 (B), SCD-1(C) and ACC (D) when stratified by maternal FFA.  $n=7-10$ .

# Supplementary Figure 5: ProteinSimple WES chemiluminescent protein measures

## A. LXR $\alpha$

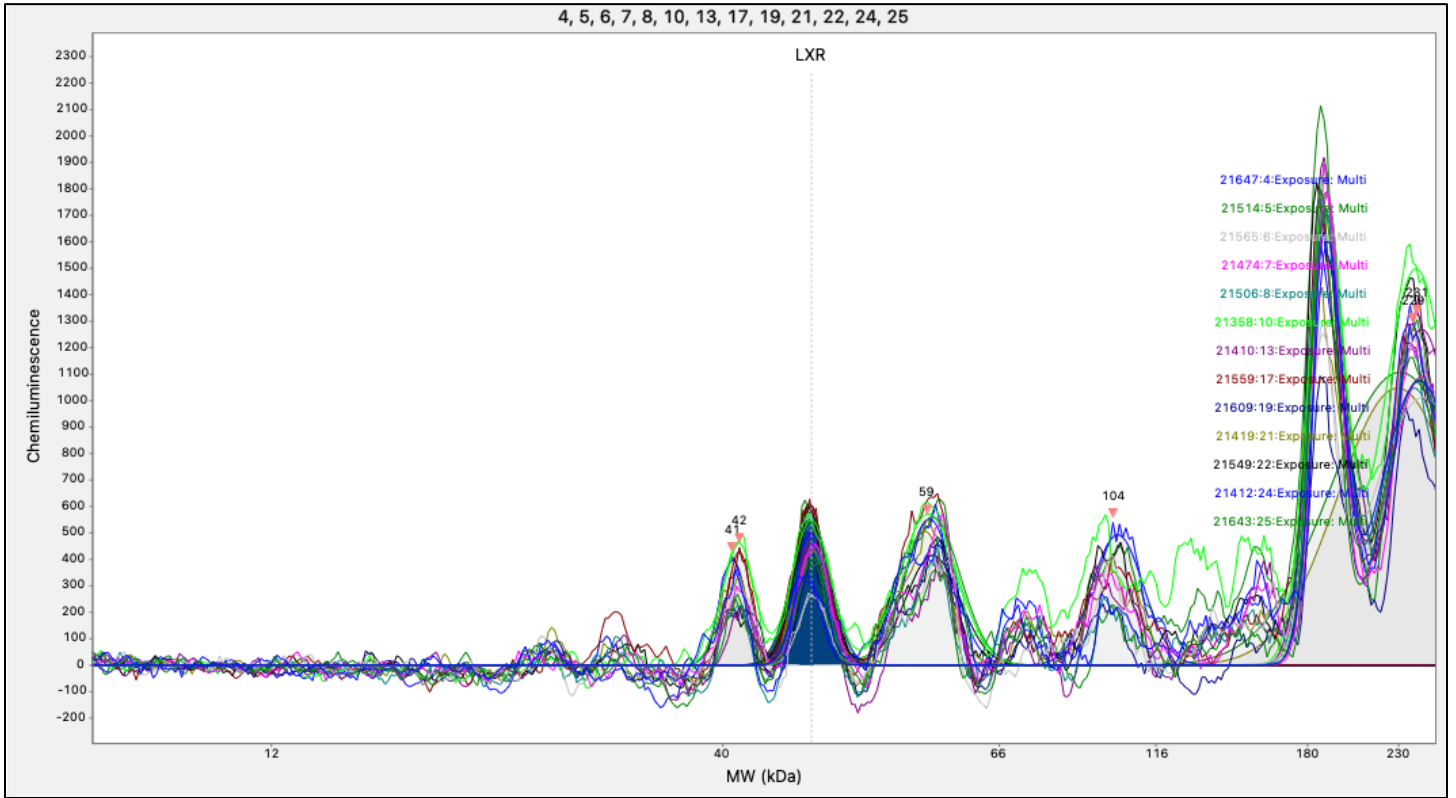

## B. SREBP1c

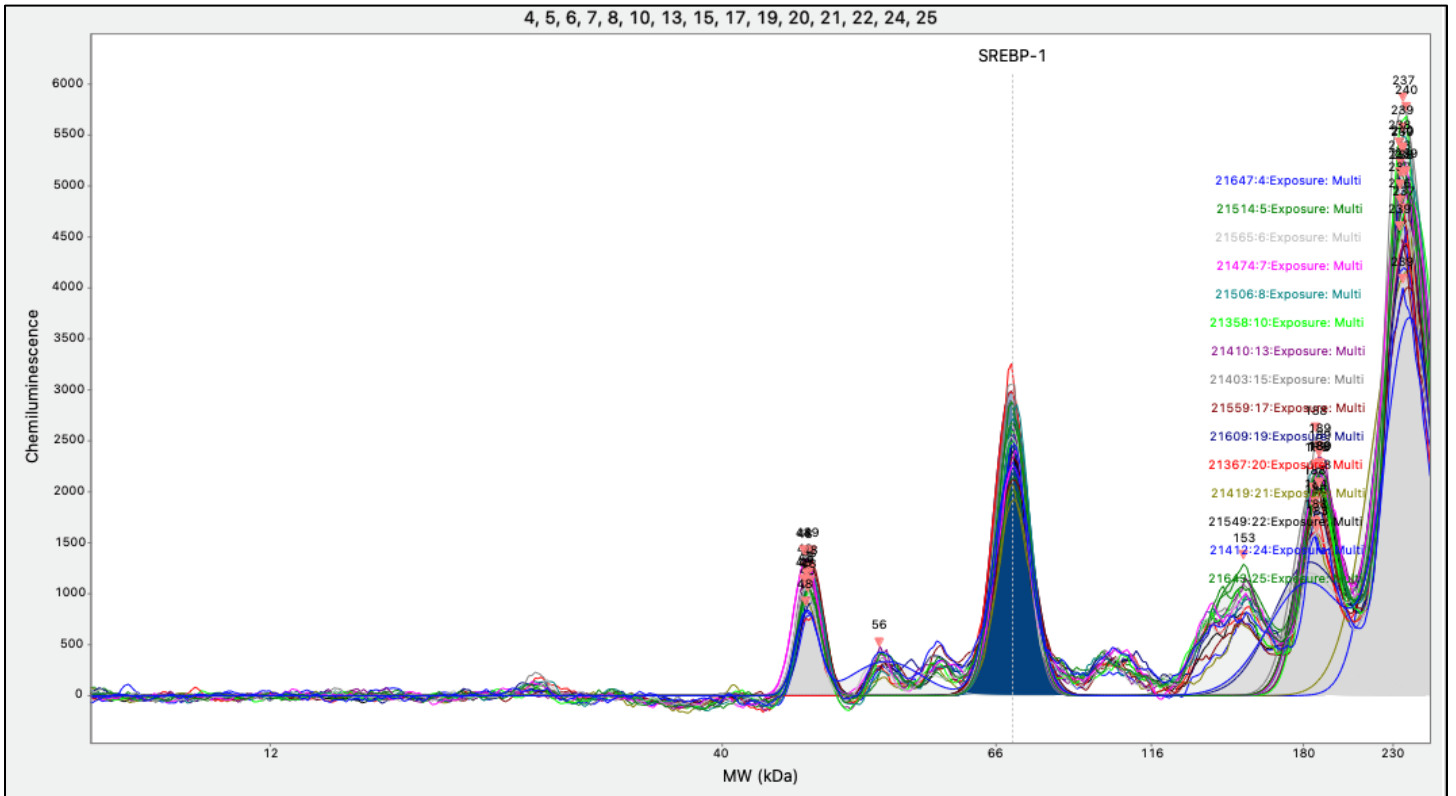





### E. Akt

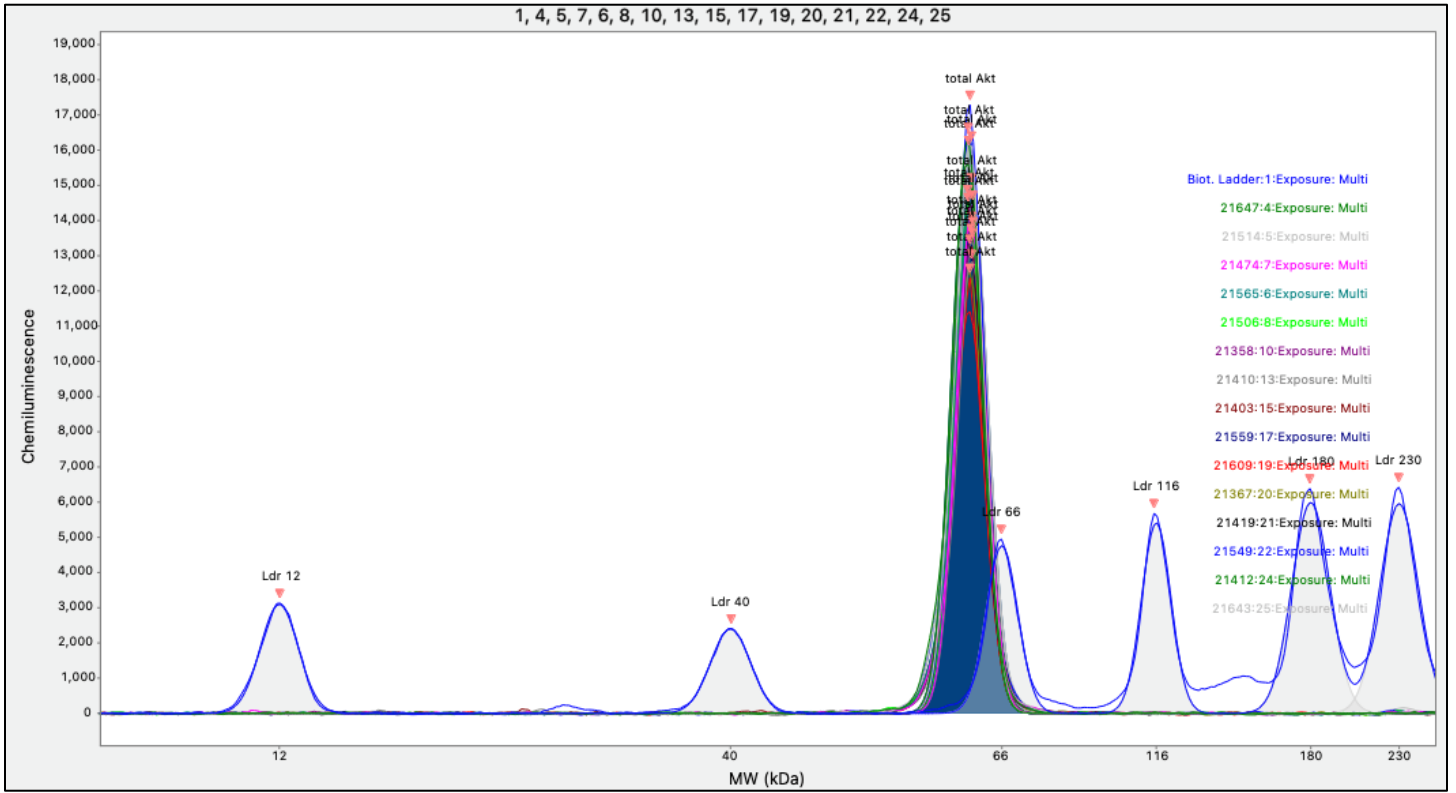

### F. Akt<sup>ser473</sup>

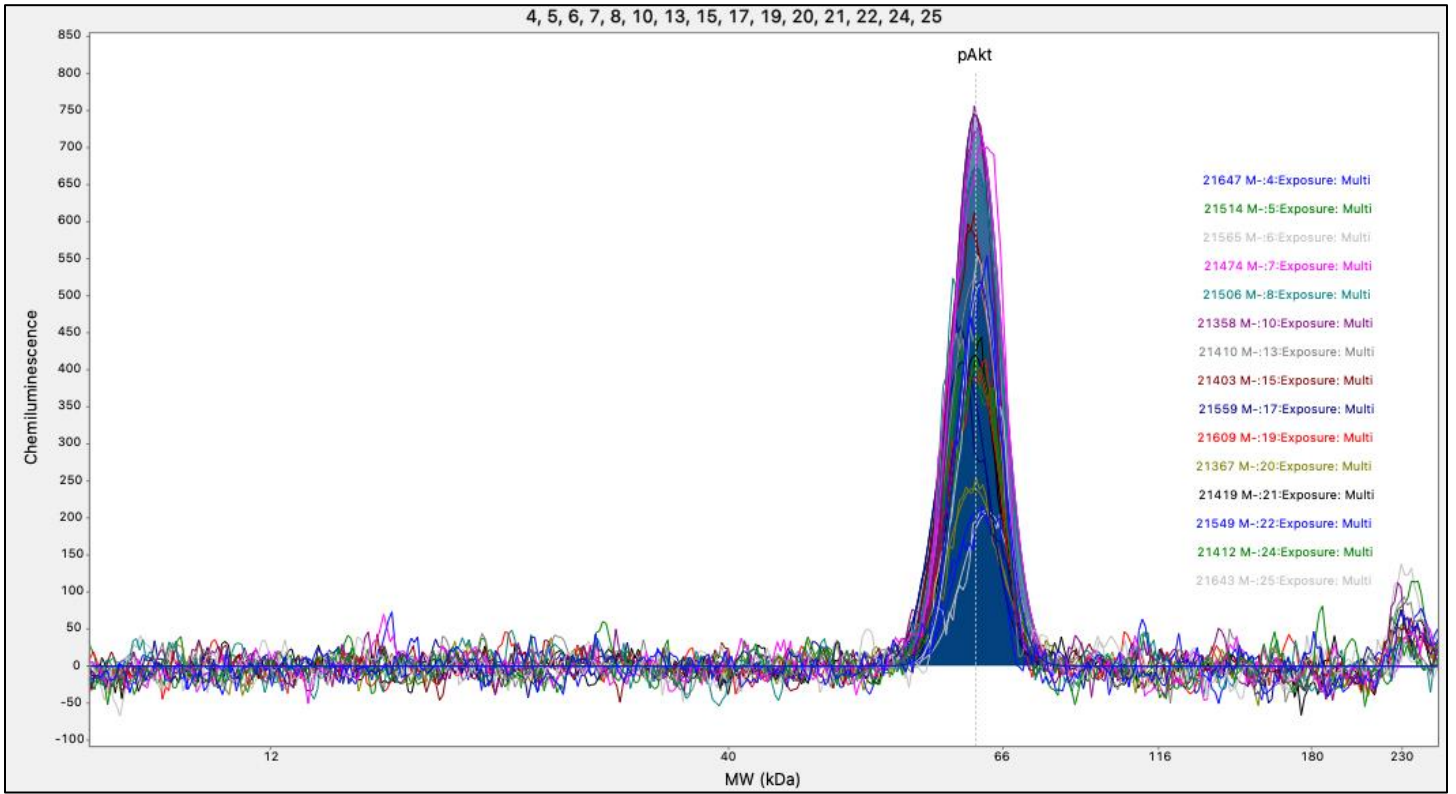

### G. mTOR

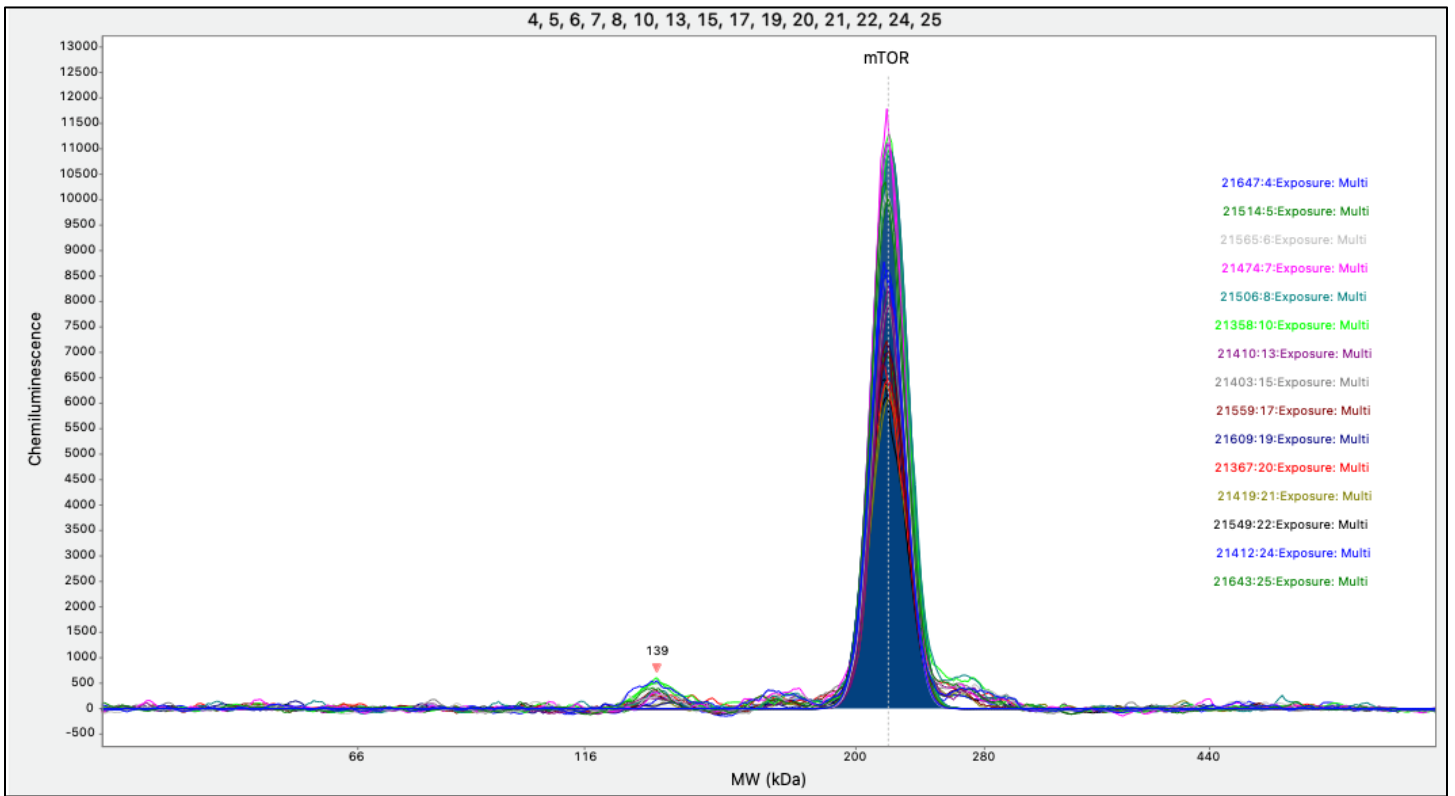

### H. mTOR<sup>Ser2448</sup>

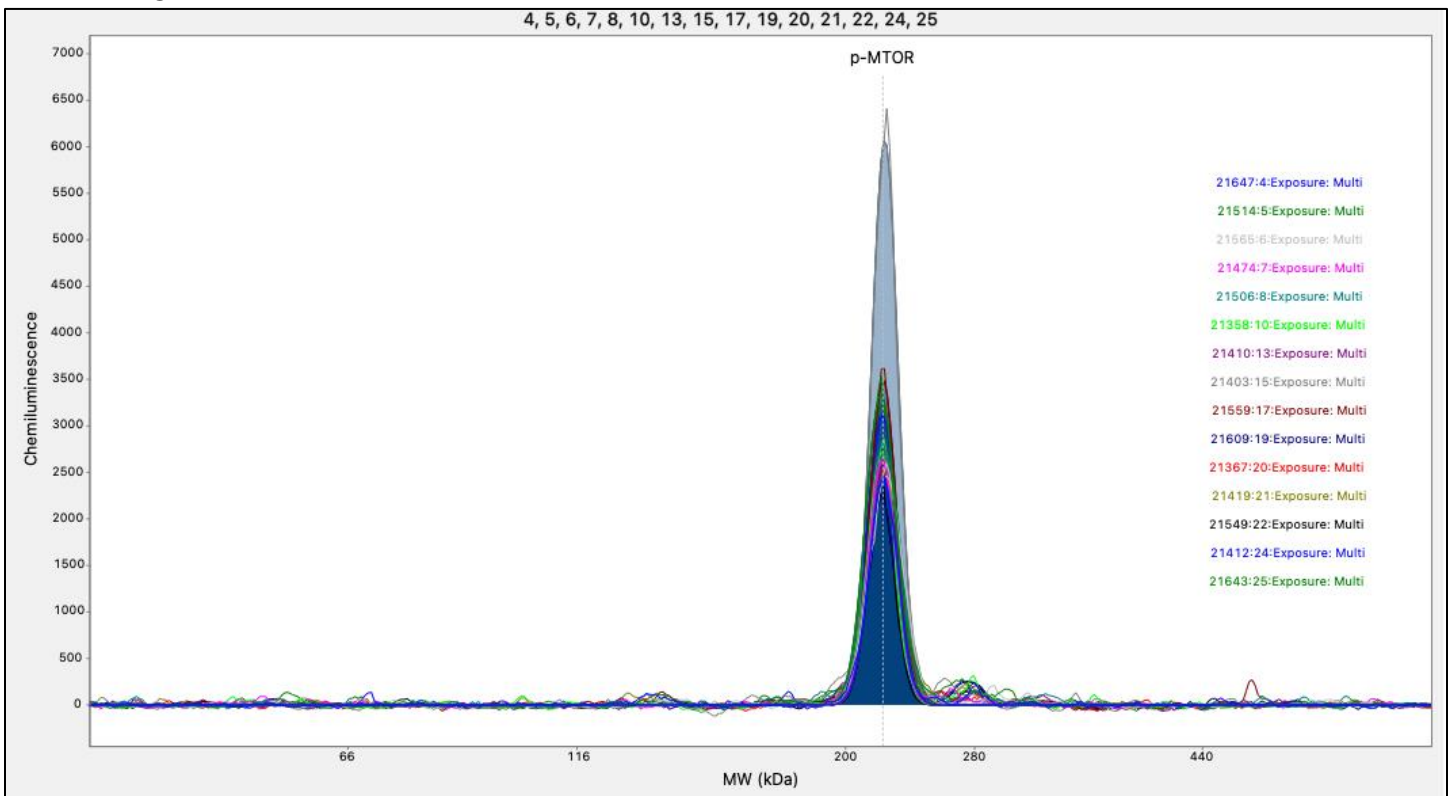

I. p70S6K<sup>T421/T424</sup> and p85S6K<sup>T424/T447</sup>

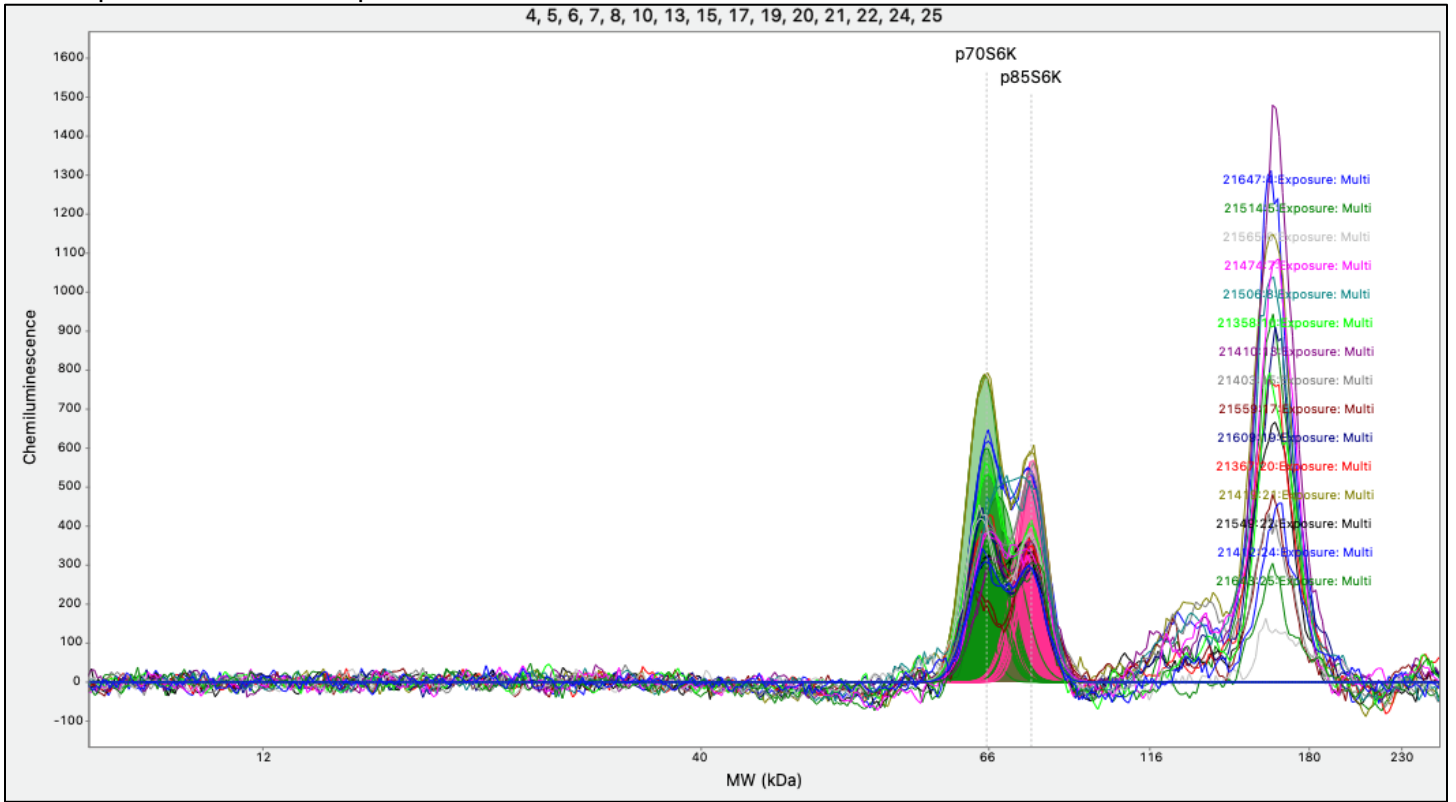

J. GLUT4

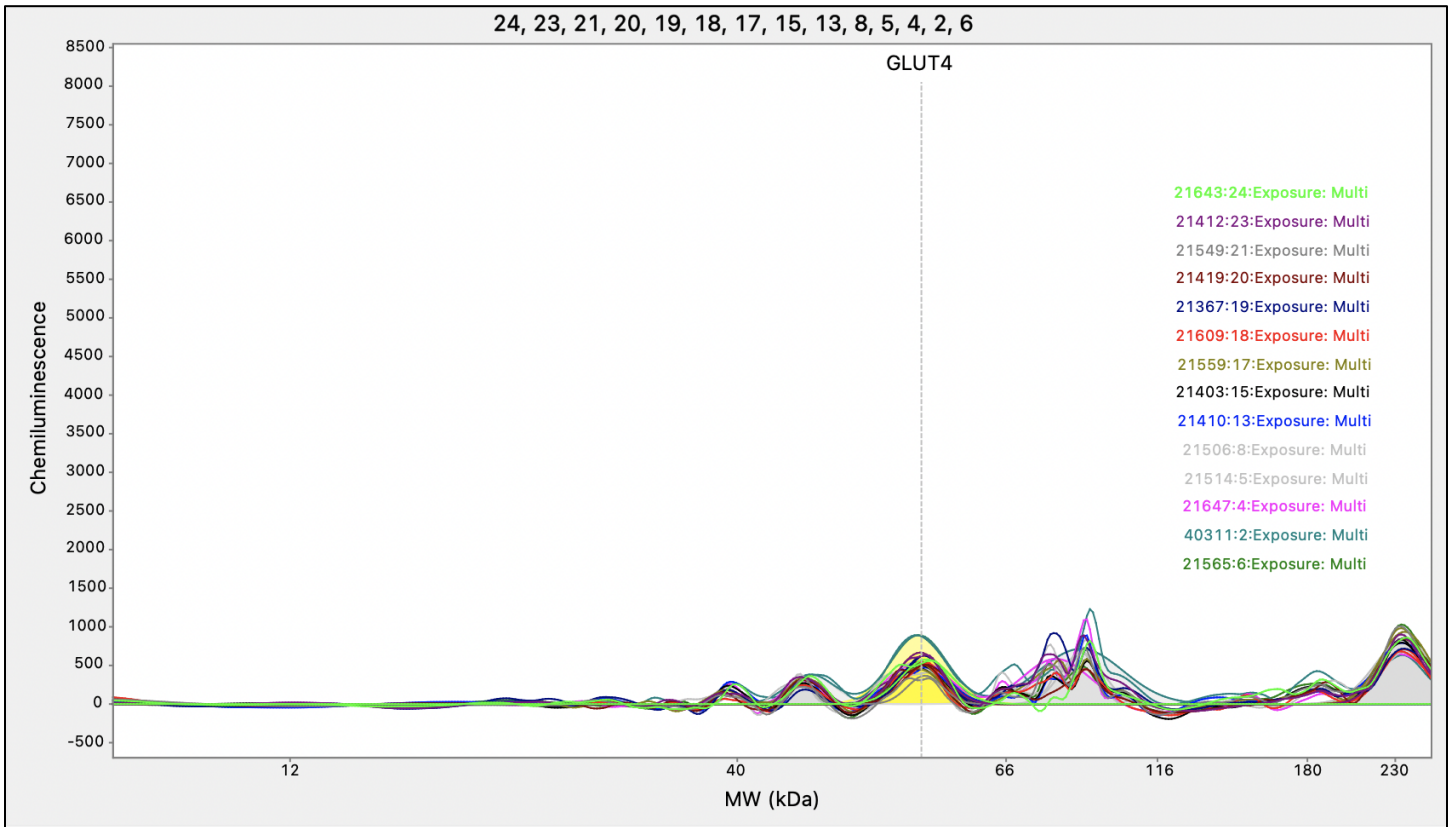

### K. SCD-1

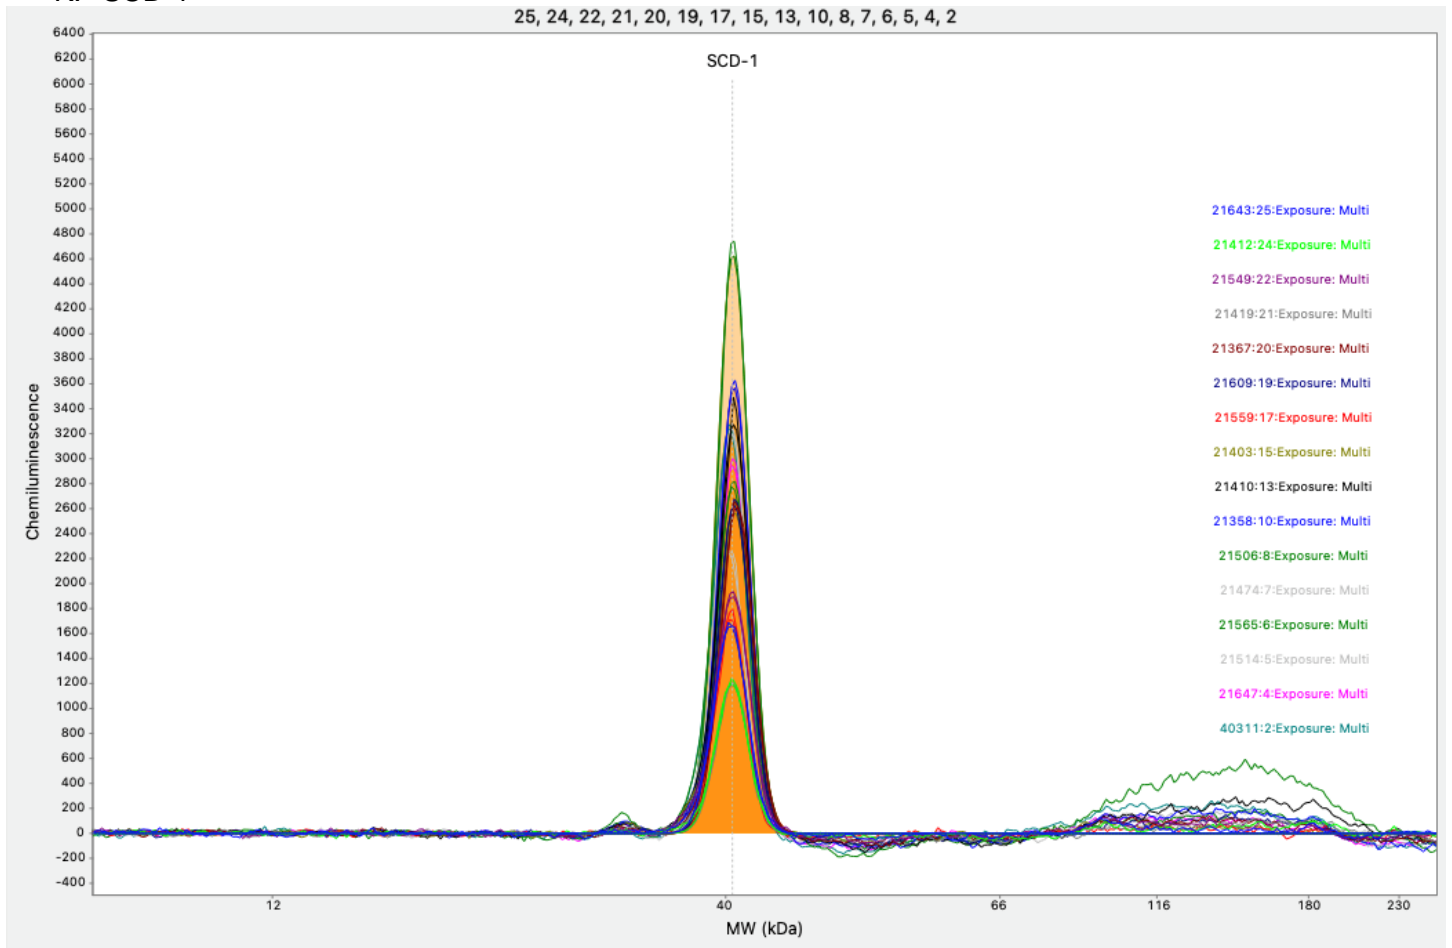

### L. ACC

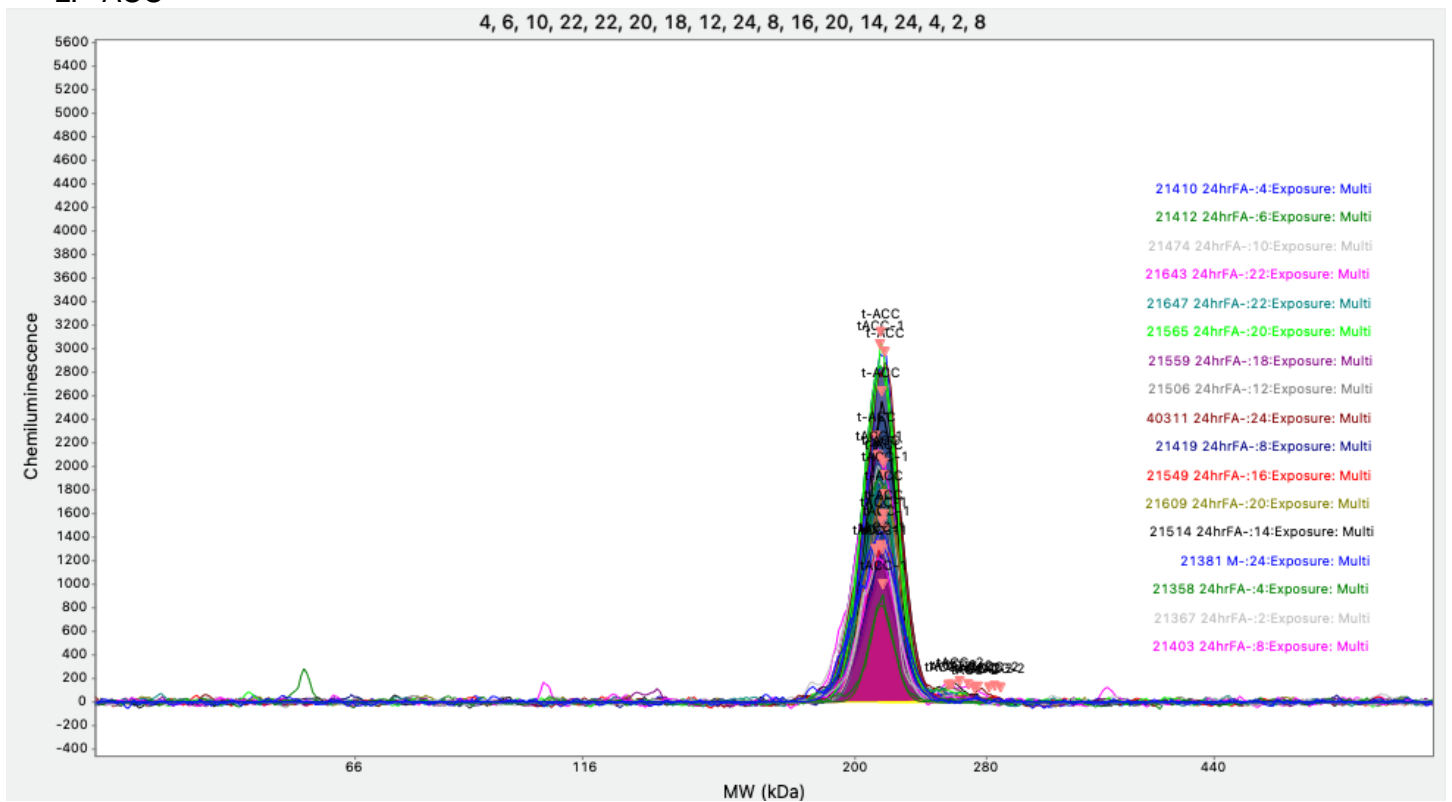

M. ACC<sup>Ser79</sup>

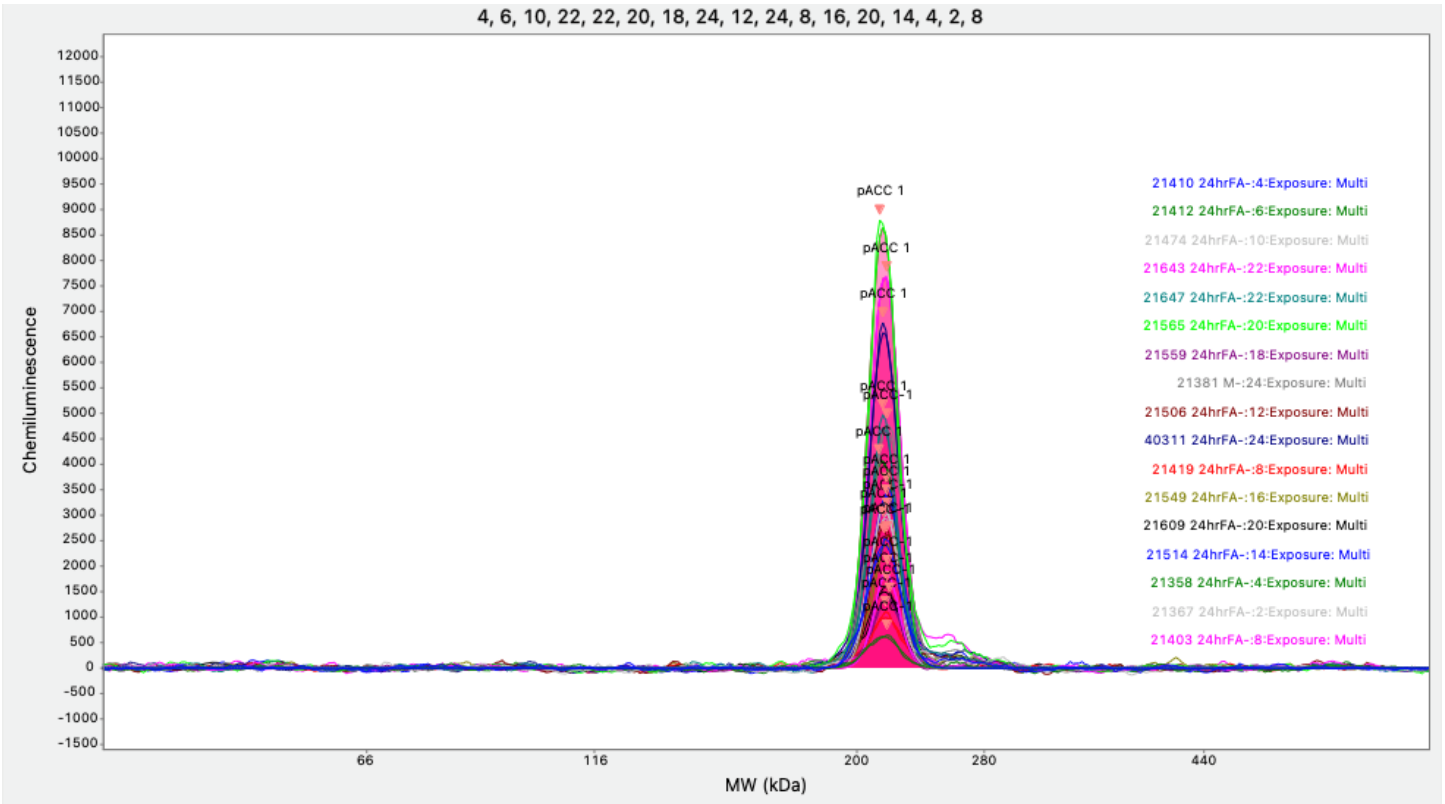

N.  $\beta$ -actin

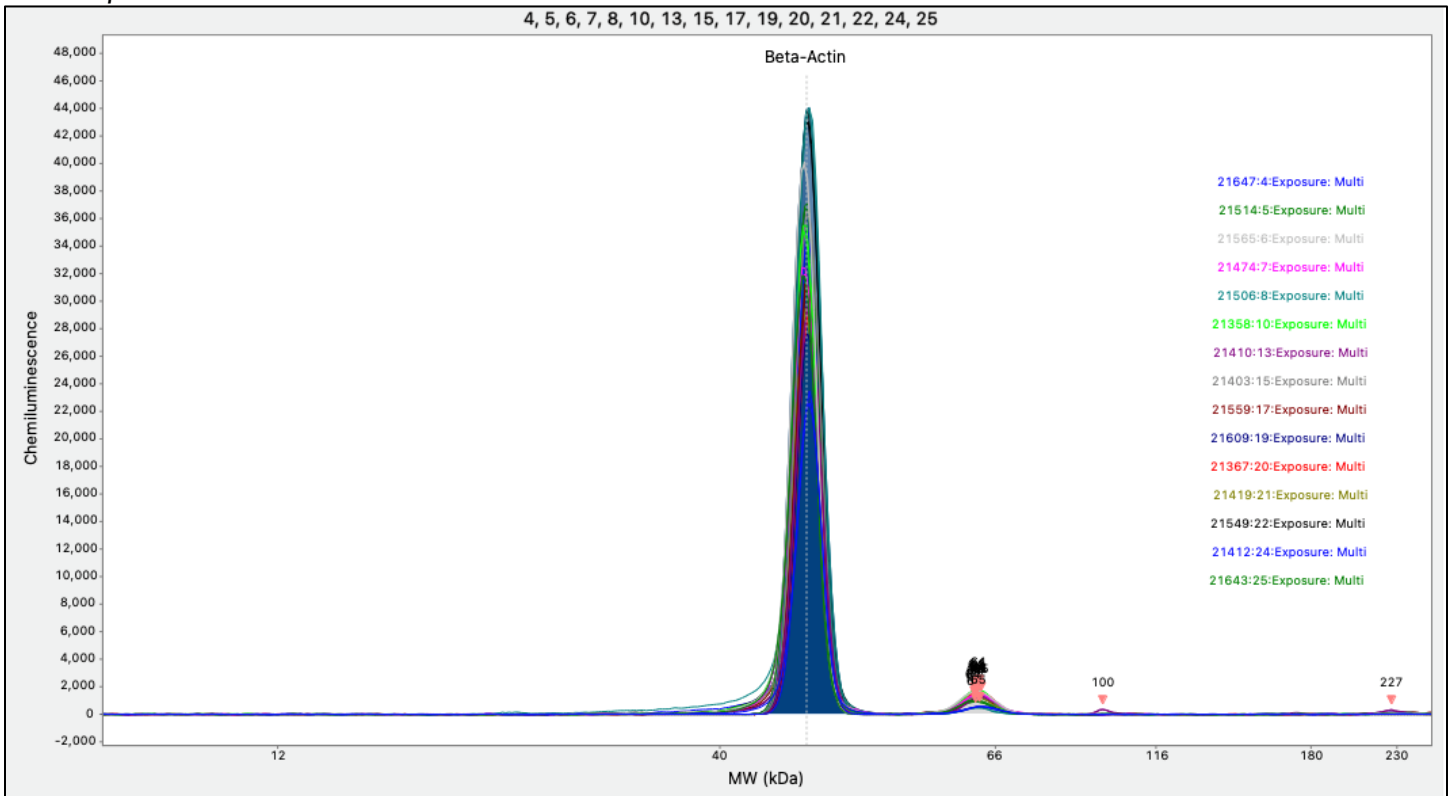

Supplement: Supplementary file 1 [file 35214742]
